# Supplementary material for: Transcriptomic, mutational and structural bioinformatics approaches to explore the therapeutic role of FAP in predominant cancer types
Source: Springer Nature journal article supplement (doi:10.1007/s12672-024-01531-x), 2024-11-23
Supplement: MOESM5 [file 12672_2024_1531_MOESM5_ESM.pdf]

**Transcriptomic, mutational and structural bioinformatics approaches to explore the therapeutic role of FAP in predominant cancer types**

**Gayathri Ashok<sup>1,2</sup>, Abdullah F AlAsmari<sup>3</sup>, Fawaz AlAsmari<sup>3</sup>, Paul Livingstone<sup>4</sup>, Anand**

**Anbarasu<sup>1,5</sup>, Sudha Ramaiah<sup>1,2\*</sup>**

*<sup>1</sup>Medical and Biological Computing Laboratory, School of Biosciences and Technology (SBST), Vellore Institute of Technology (VIT), Vellore-632014, Tamil Nadu, India*

*<sup>2</sup>Department of Bio-Sciences, SBST, VIT, Vellore-632014, Tamil Nadu, India*

*<sup>3</sup>Department of Pharmacology and Toxicology, College of Pharmacy, King Saud University, 13 Riyadh 11451, Saudi Arabia*

*<sup>4</sup>School of Sports and Health Sciences, Cardiff Metropolitan University, Cardiff CF5 2YB, UK*

*<sup>5</sup>Department of Biotechnology, SBST, VIT, Vellore-632014, Tamil Nadu, India*

**\*Corresponding author**

Prof. (Dr.) Sudha Ramaiah

Medical and Biological Computing Laboratory

School of Biosciences and Technology

VIT, Vellore-632014

Tamil Nadu, India

Tel: +91-416-2556/2694; Fax: +91-416-2243092

Email id: [sudhaanand@vit.ac.in](mailto:sudhaanand@vit.ac.in)

**Online Resource 5A** Pan-cancer mutational profiling of FAP

| <b>Ref Residue</b> | <b>Protein Position</b> | <b>Alt Residue</b> | <b>Cancer Type</b>   | <b>Frequency</b> | <b>Frequency in overall cancer</b> |
|--------------------|-------------------------|--------------------|----------------------|------------------|------------------------------------|
| D                  | 360                     | N                  | Adrenal gland cancer | 2                | 2                                  |
| M                  | 39                      | I                  | Breast cancer        | 1                | 5                                  |
| L                  | 90                      | F                  |                      | 1                |                                    |
| L                  | 114                     | P                  |                      | 1                |                                    |
| T                  | 404                     | A                  |                      | 1                |                                    |
| S                  | 407                     | L                  |                      | 1                |                                    |
| D                  | 406                     | N                  | Cervical cancer      | 1                | 2                                  |
| I                  | 501                     | V                  |                      | 1                |                                    |
| A                  | 41                      | T                  | Colorectal cancer    | 1                | 26                                 |
| P                  | 149                     | T                  |                      | 1                |                                    |
| D                  | 198                     | E                  |                      | 1                |                                    |
| F                  | 220                     | C                  |                      | 2                |                                    |
| R                  | 263                     | W                  |                      | 1                |                                    |
| V                  | 282                     | I                  |                      | 1                |                                    |
| T                  | 297                     | M                  |                      | 2                |                                    |
| F                  | 323                     | C                  |                      | 2                |                                    |
| F                  | 350                     | L                  |                      | 1                |                                    |
| S                  | 363                     | L                  |                      | 1                |                                    |
| S                  | 407                     | L                  |                      | 1                |                                    |
| Q                  | 502                     | H                  |                      | 2                |                                    |
| Y                  | 541                     | C                  |                      | 1                |                                    |
| T                  | 577                     | I                  |                      | 1                |                                    |
| T                  | 602                     | A                  |                      | 2                |                                    |
| R                  | 605                     | G                  |                      | 3                |                                    |
| I                  | 620                     | M                  |                      | 2                |                                    |
| T                  | 681                     | N                  |                      | 1                |                                    |
| S                  | 237                     | P                  | Esophageal cancer    | 1                | 9                                  |
| Y                  | 239                     | C                  |                      | 1                |                                    |
| A                  | 273                     | V                  |                      | 1                |                                    |
| V                  | 315                     | A                  |                      | 1                |                                    |
| S                  | 363                     | L                  |                      | 1                |                                    |
| Y                  | 451                     | C                  |                      | 1                |                                    |
| Y                  | 625                     | C                  |                      | 1                |                                    |
| V                  | 629                     | I                  |                      | 1                |                                    |
| N                  | 742                     | Y                  |                      | 1                |                                    |
| R                  | 303                     | L                  | Head and neck cancer | 1                | 9                                  |
| N                  | 413                     | S                  |                      | 1                |                                    |
| D                  | 457                     | N                  |                      | 2                |                                    |
| E                  | 609                     | A                  |                      | 2                |                                    |
| S                  | 710                     | L                  |                      | 1                |                                    |
| T                  | 741                     | K                  |                      | 2                |                                    |

|   |     |   |                    |             |    |
|---|-----|---|--------------------|-------------|----|
| E | 512 | D | Hematologic cancer | 1           | 3  |
| N | 556 | Y |                    | 1           |    |
| L | 584 | H |                    | 1           |    |
| L | 68  | P | Kidney cancer      | 1           | 2  |
| E | 495 | K |                    | 1           |    |
| L | 78  | I | Liver cancer       | 1           | 20 |
| T | 83  | K |                    | 1           |    |
| P | 107 | H |                    | 1           |    |
| Q | 110 | K |                    | 1           |    |
| L | 121 | I |                    | 1           |    |
| T | 269 | N |                    | 1           |    |
| T | 300 | N |                    | 1           |    |
| S | 319 | Y |                    | 1           |    |
| S | 358 | R |                    | 1           |    |
| A | 361 | D |                    | 1           |    |
| Q | 405 | K |                    | 1           |    |
| N | 423 | K |                    | 1           |    |
| S | 428 | R |                    | 1           |    |
| R | 480 | S |                    | 1           |    |
| P | 526 | H |                    | 1           |    |
| A | 554 | D |                    | 1           |    |
| G | 576 | V |                    | 2           |    |
| A | 619 | D |                    | 1           |    |
| G | 637 | E |                    | 1           |    |
| R | 27  | C |                    | Lung cancer |    |
| T | 51  | R | 1                  |             |    |
| K | 55  | T | 2                  |             |    |
| M | 95  | V | 5                  |             |    |
| Y | 113 | F | 1                  |             |    |
| P | 179 | Q | 1                  |             |    |
| P | 216 | T | 1                  |             |    |
| I | 231 | M | 2                  |             |    |
| Q | 307 | R | 1                  |             |    |
| R | 324 | K | 1                  |             |    |
| E | 325 | K | 1                  |             |    |
| K | 334 | N | 1                  |             |    |
| G | 349 | V | 2                  |             |    |
| G | 373 | C | 1                  |             |    |
| E | 396 | G | 2                  |             |    |
| V | 439 | I | 1                  |             |    |
| R | 444 | M | 1                  |             |    |
| E | 489 | D | 1                  |             |    |
| L | 511 | I | 1                  |             |    |
| R | 590 | Q | 4                  |             |    |
| A | 633 | S | 1                  |             |    |
| A | 648 | V | 1                  |             |    |

|   |     |   |                   |   |    |
|---|-----|---|-------------------|---|----|
| G | 666 | C |                   | 2 |    |
| T | 700 | I |                   | 1 |    |
| S | 737 | Y |                   | 1 |    |
| G | 738 | C |                   | 2 |    |
| S | 435 | I | Malignant glioma  | 1 | 14 |
| N | 556 | Y |                   | 8 |    |
| G | 581 | S |                   | 2 |    |
| L | 674 | V |                   | 1 |    |
| E | 675 | D |                   | 1 |    |
| A | 711 | S |                   | 1 |    |
| P | 59  | S | Melanoma          | 1 | 60 |
| G | 64  | A |                   | 1 |    |
| P | 149 | S |                   | 3 |    |
| P | 179 | S |                   | 3 |    |
| G | 195 | R |                   | 3 |    |
| E | 204 | K |                   | 3 |    |
| D | 241 | N |                   | 1 |    |
| E | 242 | K |                   | 1 |    |
| N | 259 | K |                   | 1 |    |
| P | 272 | S |                   | 2 |    |
| S | 363 | L |                   | 3 |    |
| H | 376 | R |                   | 3 |    |
| E | 385 | K |                   | 7 |    |
| R | 421 | K |                   | 1 |    |
| F | 455 | I |                   | 1 |    |
| P | 472 | S |                   | 3 |    |
| G | 479 | E |                   | 3 |    |
| S | 531 | L |                   | 2 |    |
| P | 535 | S |                   | 3 |    |
| R | 590 | Q |                   | 3 |    |
| S | 631 | L |                   | 1 |    |
| G | 637 | E |                   | 4 |    |
| G | 699 | E |                   | 2 |    |
| S | 757 | F |                   | 5 |    |
| P | 245 | L | Ovarian cancer    | 2 | 4  |
| D | 301 | N |                   | 1 |    |
| T | 741 | K |                   | 1 |    |
| S | 71  | F | Pancreatic cancer | 3 | 11 |
| Y | 124 | F |                   | 1 |    |
| R | 142 | I |                   | 1 |    |
| R | 148 | H |                   | 1 |    |
| I | 183 | M |                   | 1 |    |
| E | 302 | K |                   | 1 |    |
| R | 303 | G |                   | 1 |    |
| H | 477 | P |                   | 1 |    |
| V | 588 | M |                   | 1 |    |

|   |     |   |                        |   |    |
|---|-----|---|------------------------|---|----|
| N | 227 | Y | Sarcoma                | 1 | 2  |
| R | 311 | G |                        | 1 |    |
| S | 369 | R | Skin cancer            | 1 | 1  |
| S | 316 | L | Stomach cancer         | 4 | 4  |
| C | 23  | Y | Urinary bladder cancer | 1 | 5  |
| Y | 79  | F |                        | 1 |    |
| P | 179 | S |                        | 1 |    |
| S | 342 | R |                        | 1 |    |
| Q | 539 | E |                        | 1 |    |
| W | 4   | S | Uterine cancer         | 2 | 30 |
| A | 72  | T |                        | 1 |    |
| V | 77  | I |                        | 1 |    |
| L | 162 | S |                        | 2 |    |
| A | 163 | T |                        | 1 |    |
| K | 219 | T |                        | 1 |    |
| D | 241 | N |                        | 1 |    |
| R | 263 | Q |                        | 1 |    |
| S | 316 | L |                        | 1 |    |
| K | 334 | N |                        | 2 |    |
| D | 382 | Y |                        | 1 |    |
| A | 387 | D |                        | 1 |    |
| D | 406 | E |                        | 1 |    |
| S | 407 | L |                        | 1 |    |
| F | 415 | S |                        | 1 |    |
| I | 429 | T |                        | 1 |    |
| S | 474 | F |                        | 1 |    |
| E | 484 | V |                        | 1 |    |
| N | 491 | I |                        | 1 |    |
| N | 500 | D |                        | 1 |    |
| R | 530 | I |                        | 1 |    |
| R | 590 | Q |                        | 1 |    |
| G | 593 | D |                        | 1 |    |
| A | 603 | T |                        | 1 |    |
| A | 657 | V |                        | 1 |    |
| Y | 660 | C |                        | 1 |    |
| F | 664 | L | 1                      |   |    |

**Online Resource 5B** Stabilizing and deleterious mutations with a frequency  $\geq 2$  in FAP

| Ref Residue | Protein Position | Alt Residue | Cancer Type              | Frequency | DDS (kcal.mol <sup>-1</sup> .K <sup>-1</sup> ) | Flexibility     | DDG (kcal/mol) | Stability          | Functional Impact  |
|-------------|------------------|-------------|--------------------------|-----------|------------------------------------------------|-----------------|----------------|--------------------|--------------------|
| S           | 71               | F           | Pancreatic Cancer        | 3         | -0.023                                         | Decrease        | 0.323          | Stabilizing        | Deleterious        |
| E           | 204              | K           | Melanoma                 | 3         | -0.197                                         | Decrease        | 0.622          | Stabilizing        | Deleterious        |
| I           | 231              | M           | Lung Cancer              | 2         | -0.176                                         | Decrease        | 0.328          | Stabilizing        | Deleterious        |
| P           | 245              | L           | Ovarian Cancer           | 2         | -0.422                                         | Decrease        | 0.413          | Stabilizing        | Deleterious        |
| R           | 263              | W           | Colorectal Cancer        | 1         | -0.771                                         | Decrease        | 1.408          | Stabilizing        | Deleterious        |
| T           | 297              | M           | Colorectal Cancer        | 2         | -0.332                                         | Decrease        | 0.788          | Stabilizing        | Deleterious        |
| H           | 376              | R           | Melanoma                 | 3         | -0.082                                         | Decrease        | 0.163          | Stabilizing        | Deleterious        |
| G           | 479              | E           | Melanoma                 | 3         | -0.742                                         | Decrease        | 0.477          | Stabilizing        | Deleterious        |
| S           | 531              | L           | Melanoma                 | 2         | -0.014                                         | Decrease        | 0.072          | Stabilizing        | Deleterious        |
| P           | 535              | S           | Melanoma                 | 3         | 0.094                                          | Increase        | 0.131          | Stabilizing        | Deleterious        |
| <b>G</b>    | <b>576</b>       | <b>V</b>    | <b>Liver Cancer</b>      | <b>2</b>  | <b>-0.973</b>                                  | <b>Decrease</b> | <b>0.045</b>   | <b>Stabilizing</b> | <b>Deleterious</b> |
| <b>G</b>    | <b>581</b>       | <b>S</b>    | <b>Malignant Glioma</b>  | <b>2</b>  | <b>-0.486</b>                                  | <b>Decrease</b> | <b>0.038</b>   | <b>Stabilizing</b> | <b>Deleterious</b> |
| <b>I</b>    | <b>620</b>       | <b>M</b>    | <b>Colorectal Cancer</b> | <b>2</b>  | <b>-0.492</b>                                  | <b>Decrease</b> | <b>0.009</b>   | <b>Stabilizing</b> | <b>Deleterious</b> |
| <b>G</b>    | <b>666</b>       | <b>C</b>    | <b>Lung Cancer</b>       | <b>2</b>  | <b>-0.543</b>                                  | <b>Decrease</b> | <b>0.147</b>   | <b>Stabilizing</b> | <b>Deleterious</b> |
| <b>S</b>    | <b>757</b>       | <b>F</b>    | <b>Melanoma</b>          | <b>5</b>  | <b>-0.166</b>                                  | <b>Decrease</b> | <b>1.289</b>   | <b>Stabilizing</b> | <b>Deleterious</b> |

\*Bold indicates the mutations present in the catalytic domain
